# Supplementary material for: Quantile Regression Analysis of Depression and Clinical Symptom Degree in Chinese Patients with Spinocerebellar Ataxia Type 3
Source: Hindawi journal article supplement (doi:10.1155/2020/1394617), 2020-06-10
Supplement: f1 [file 1394617.f1.csv]

N	ÐÕÃû	DNA±àºÅ	ÐÔ±ð	CAGÐ¡	CAG´ó	ËæÕïÄêÁä	·¢²¡ÄêÁä	²¡³Ì	Æð²¡BMI	¾ÍÕïBMI	SARA	SARA.Y	ICARS	ICARS.Y	ÊÈË¯	Æ£ÀÍ	±´¿Ë
1	´÷ÆäÐã	2211	Å®	29	76	55	40	15	NA	17.274	18	1.2	42	2.8	2	7	5
2	ÓÈÎÄÁÖ	15052	ÄÐ	14	74	41	39	2.5	24.221	24.221	10	5	20	10	17	9	41
3	ÓÈ³¤»³	17073	ÄÐ	14	71	44	41	3	28.374	28.374	9	3	24	8	7	9	22
4	ÒÏ»Î	13039	ÄÐ	30	79	31	26	5	NA	28.374	8	8	19	19	17	13	28
5	³Â¹óÓñ	4791	Å®	27	76	49	35	14	NA	25	26	1.86	49	3.5	0	11	41
6	Àî·ï	3985	Å®	14	81	35	22	13	NA	12.903	19	1.46	43	3.31	11	7	24
7	ºéÈÙ·¢	15327	ÄÐ	27	72	25	24	1	NA	24.944	1	1	3	3	15	2	22
8	Õ²ÊÀ»ª	12930	ÄÐ	28	76	30	25	5	24.802	29.409	4	0.8	6	1.2	3	8	0
9	³ÂÐãÓ¢	15443	Å®	14	79	41	29	12	23.237	25.236	5	0.42	16	1.33	14	12	27
10	ºúÏþÑà	15623	Å®	28	74	40	36	4	21.631	21.631	3	0.75	5	1.25	2	0	1
11	ºÎ»ªÏã	15621	Å®	19	71	61	41	20	23.328	23.328	19.5	0.98	48	2.4	9	7	39
12	Áõºç½õ	15533	ÄÐ	14	78	38	18	20	19.531	18.359	6	0.3	20	1	6	13	30
13	ÀîÔö·¢	10917	ÄÐ	14	75	41	36	5	22.583	22.583	1	0.2	7	1.4	12	7	1
14	ÀîÔö²Æ	12873	ÄÐ	27	76	37	33	4	21.155	21.155	3	0.75	8	2	2	7	36
15	Àî¿ìÀÖ	15732	ÄÐ	27	80	31	25	6	24.093	22.676	6	1	22	3.67	2	11	19
16	ÁÖÍò¾§	12758	ÄÐ	14	73	49	39	10	20.196	20.196	7	0.7	17	1.7	6	4	8
17	ÁøÓñ·Ò	16058	Å®	14	71	46	37	9	21.63	21.63	3	0.33	4	0.44	5	7	4
18	ÍõÔ¶Èç	16118	ÄÐ	26	70	42	40	2.5	23.347	23.347	4	1.6	6	2.4	0	3	3
19	Ê·ÊçÓ¢	15067	Å®	28	79	35	30	5	21.083	16.866	7	1.4	18	3.6	12	14	15
20	Ê·ÊçÇÛ	17209	Å®	28	76	33	25	8	20.635	18.365	8	1	20	2.5	5	6	16
21	Ê·³¬Èº	17211	ÄÐ	14	76	32	15	17	19.91	15.581	16	0.94	45	2.65	6	10	31
22	ÎâÖ¾½£	11277	ÄÐ	29	73	30	29	1	27.084	27.084	2	2	10	10	10	10	6
23	ÁÖ±¦Óñ	3480	Å®	14	72	63	41	22	20.957	16.847	14	0.64	43	1.95	2	9	31
24	ÁÖÒÀÏª	3481	ÄÐ	14	71	62	53	9	26.196	21.462	18	2	47	5.22	3	11	16
25	ÖÓÓýÇÚ	17009	ÄÐ	14	76	25	19	6	19.531	17.578	6	1	17	2.83	19	12	41
26	³ÂÐã»¨	17007	Å®	27	77	44	34	10	22.449	22.449	21	2.1	46	4.6	3	11	32
27	³Â²ýÐÇ	17011	ÄÐ	14	74	52	32	20	25.391	25.391	13	0.65	32	1.6	4	9	43
28	Óà³ÉÒø	12103	Å®	29	77	38	32	6	23.434	22.432	6	1	15	2.5	13	7	14
29	ÁÖÇìÁú	17014	ÄÐ	14	80	20	19	1	18.59	18.59	3	3	8	8	8	9	34
30	ÎâÒã¾ü	13943	ÄÐ	14	72	48	43	5	21.28	20.415	11	2.2	32	6.4	5	8	39
31	µË´ºæ·	8801	Å®	31	77	48	41	7	20.889	18.667	15	2.14	38	5.43	7	10	39
32	³Â¹ðÇà	15073	Å®	21	66	38	34	4	24.69	20.883	13.5	3.38	33	8.25	6	6	28
33	ÕÅ¶¨ÖÐ	8099	ÄÐ	26	72	50	38	12	21.718	21.718	9.5	0.79	28	2.33	11	13	46
34	²Ì½¨°²	8789	ÄÐ	14	77	37	29	8	20.761	20.761	14.5	1.81	42	5.25	6	13	33
35	³ÂÐãÖé	12406/12426	Å®	20	70	65	55	10	20.444	20.444	18	1.8	47	4.7	12	10	9
36	ÀÖÓñÑÞ	12740	Å®	14	81	24	19	5	22.667	20.889	12	2.4	28	5.6	4	9	17
37	Á¬Ð¡Àö	14326	Å®	19	81	27	18	9	21.155	19.721	11	1.22	25	2.78	2	9	9
38	ÐìÐ¡Æ¼	17099	Å®	14	77	50	35	15	21.484	17.578	31	2.07	75	5	22	10	43
39	Õ²ÐËÆÚ	12783	ÄÐ	14	72	53	45	8	24.093	22.321	16.5	2.06	43	5.38	11	13	28
40	Õ²ÐËÁÁ	12929	ÄÐ	14	72	59	40	19	21.193	17.475	20	1.05	50	2.63	1	7	47
41	³ÂÂ¶	11852	Å®	30	78	38	26	12	19.473	19.473	12	1	28	2.33	4	6	23
42	ÀîÈðÕê	15075	Å®	28	72	44	34	10	23.613	23.613	13	1.3	31	3.1	21	10	28
43	ÕÅ»Ô	4277/11877	ÄÐ	29	80	33	15	18	21.755	19.778	29.5	1.64	62	3.44	0	10	27
44	ÕÅÌÒ´«	10190	ÄÐ	14	73	57	48	9	22.039	18.365	13	1.44	35	3.89	11	11	37
45	ÕÅ½ðÁ«	10410	Å®	20	77	37	34	3	18.591	18.591	6	2	13	4.33	7	5	2
46	Â¬Ð¡Çí	10192	Å®	26	76	31	29	2	23.438	23.438	0	0	0	0	9	3	0
47	³Â³¤Ò«	17165	ÄÐ	29	75	39	34	5	20.883	20.883	7	1.4	16	3.2	9	13	28
48	³ÂÓÑÒå	9601	ÄÐ	28	71	45	39	6	25.351	25.351	15	2.5	43	7.17	3	12	39
49	Óà¹úÈÝ	9523	Å®	14	76	49	42	7	24.034	20.029	24	3.43	59	8.43	13	11	43
50	ÑîÎ°ÌÚ	7872	ÄÐ	14	75	32	20	12	19.726	18.148	19.5	1.63	46	3.83	6	5	28
51	Ñî±þ·ï	17214	Å®	14	71	54	45	9	22.6	22.6	11.5	1.28	34	3.78	5	6	10
52	»Æ¹ðÁÖ	12353	ÄÐ	18	70	47	41	6	21.224	21.224	4	0.67	13	2.17	2	9	4
53	»Æ½ðÍÁ	17217	ÄÐ	14	66	57	46	11	18.819	18.819	4	0.36	14	1.27	2	9	4
54	ÑÏ³É×Æ	8715	ÄÐ	14	74	60	43	17	18.424	18.424	15.5	0.91	47	2.76	5	12	39
55	×¿ÇÉÁá£¨8715±íµÜ£©	17359	ÄÐ	33	73	42	40	2	23.243	20.904	6	3	17	8.5	11	8	47
56	ÁÖÏ¸ÈÝ	8103	Å®	27	73	57	49	8	21.631	17.625	14	1.75	36	4.5	15	11	54
57	ÐíÈðÔª	6421	ÄÐ	25	70	53	46	7	28.345	24.082	11.5	1.64	31	4.43	5	13	17
58	¸ßÈðÝæ	16666	Å®	14	72	53	41	12	18.75	15.625	15	1.25	38	3.17	5	10	45
59	×£ÎÄ½¿	10494	Å®	14	71	60	45	15	24.035	24.035	8	0.53	21	1.4	6	4	32
60	Àî³ÂÓñ	6935	Å®	29	77	47	37	10	22.432	22.432	20	2	52	5.2	1	13	24
61	³ÂÏèÐÒ	17373	ÄÐ	14	74	44	32	12	19.592	19.592	24	2	51	4.25	6	11	43
62	²ÌÎâ¾²	9067	ÄÐ	14	79	26	19	7	NA	20.55	15.5	2.21	37	5.29	3	8	14
63	²Ì¹ðÁÕ	9434	ÄÐ	14	70	51	46	5	24.539	24.539	6	1.2	18	3.6	5	8	34
64	»ÆÉÆÓñ	17367	Å®	24	71	48	45	3	20.546	20.546	4	1.33	8	2.67	3	8	14
65	Àî»ú»¨	3874/11971	Å®	14	73	58	45	13	25.631	23.495	18	1.38	50	3.85	6	12	47
66	ÎâÐÂ±ó	17370	ÄÐ	29	78	40	34	6	19.592	16.327	15	2.5	39	6.5	13	11	38
67	Àî·¼Ë®	12429/17369	ÄÐ	14	74	50	41	9	NA	21.231	16.5	1.83	51	5.67	4	13	32
68	Àî³¤À¼	17371	Å®	14	73	34	32	2	19.031	19.031	7	3.5	19	9.5	11	14	35
69	ÍõÁøÏÉ	11726	Å®	29	77	40	32	8	20.135	20.135	21	2.63	53	6.63	18	13	15
70	ÕÅÑîÄÜ	17372	ÄÐ	14	79	25	23	2	20.861	18.809	5	2.5	15	7.5	5	9	24
71	Îâ³Ð±ª	16508	ÄÐ	20	75	34	31	3	18.809	18.809	7	2.33	18	6	14	11	15
72	ÎâÓñÁ«	16509	Å®	34	78	39	35	4	22.862	22.862	6	1.5	15	3.75	11	10	21
73	ºúÏþ±ø	13958/14740	ÄÐ	64	67	43	33	10	20.957	20.957	12	1.2	28	2.8	16	13	42
74	Ê¯Óñ	14737	Å®	14	74	54	49	5	20.316	18.359	5	1	13	2.6	3	5	8
75	³ÂÓÀ¹â	12171	ÄÐ	14	72	39	30	9	19.031	20.761	5	0.56	17	1.89	4	0	0
76	ÕÅÏÈ¾Õ	17423	Å®	14	74	45	33	12	18.827	18.827	21	1.75	48	4	4	11	12
77	Ò¶Æä»Ô	17957	ÄÐ	14	75	36	30	6	25.036	23.033	10	1.67	28	4.67	11	11	7
78	ÖìÈòÓñ	17869	Å®	14	70	63	50	13	19.477	19.477	14	1.08	44	3.38	9	9	0
79	Ò¶ÓñÁ«	18379	Å®	14	74	42	39	3	18.48	18.48	6	2	20	6.67	2	11	13
80	»ÆÇÕÎÄ	18815	ÄÐ	28	80	24	17	7	18.424	17.715	11	1.57	32	4.57	7	10	35
81	»ÆºÍ°²	19053	ÄÐ	28	77	44	28	16	18.685	17.993	11	0.69	25	1.56	17	12	9
82	ËÕËØÃ÷	18684	Å®	30	78	30	24	6	18.827	16.824	7	1.17	16	2.67	7	12	14
83	ÕÅÊÇ¹ú	19110	ÄÐ	14	76	40	37	3	21.386	21.386	10.5	3.5	22	7.33	13	11	19
84	ÀîÌÒÃÃ	19191	Å®	27	75	46	40	6	20.029	20.029	19	3.17	48	8	12	11	24
85	ÀîÁÒÍÅ	19221	ÄÐ	27	72	54	51	3	20.307	20.307	12	4	28	9.33	12	12	15
86	ÔøÓý·ï	19243	ÄÐ	14	83	25	18	7	18.809	18.809	9.5	1.36	27	3.86	11	12	25
87	ÎâÖ¾Ðñ	18490/19597	ÄÐ	14	83	25	18	7	19.835	19.835	7	1	23	3.29	12	10	30
88	¹È¶þÏ¼	18317	Å®	28	77	28	26	2	18.393	18.393	3	1.5	6	3	12	5	9
89	Ð»Ã÷Áé	19284	ÄÐ	18	71	41	40	1	25.594	25.594	1	1	6	6	12	5	9
90	À¶ÃÀÁá	19219	Å®	14	72	51	44	7	23.147	23.147	0	0	5	0.71	10	11	9
91	ÍõÔ¶èå	19339	ÄÐ	14	79	34	27	7	17.993	17.993	8	1.14	19	2.71	8	6	8
92	ÀîÐ¡Ã÷	19504/2950	ÄÐ	29	76	45	31	14	22.921	21.952	11	0.79	34	2.43	10	9	28
93	ÌÆ×Ô¹â	19866	ÄÐ	25	70	59	50	9	20.761	20.761	14	1.56	38	4.22	8	12	26
94	Ö£½£Çå	20284	ÄÐ	32	78	31	26	5	19.591	19.591	6	1.2	23	4.6	3	8	15
95	½¯ÕñÄî	20412	ÄÐ	14	71	43	42	1	21.936	21.936	7	7	19	19	0	8	13
96	³ÂÈð	20595	Å®	57	65	43	38	5	18.026	15.422	21	3.5	54	9	2	12	19
97	µËÇàÃ·	20318	Å®	30	79	25	24	1	17.8	17.8	9	9	22	22	0	6	4
